# Supplementary material
Source: publisher site journal article supplement (https://www.dovepress.com/article/165681)
Supplement: Supplementary file 1 [file get_supplementary_file.php]

The Cochrane Library

Search Name: first-line endocrine therapy

Last Saved: 21/11/2017 03:20:26.119

Description:

ID Search

- #1 ribociclib:ti,ab,kw (Word variations have been searched)
- #2 LEE011:ti,ab,kw (Word variations have been searched)
- #3 #1 or #2
- #4 anastrozole:ti,ab,kw (Word variations have been searched)
- #5 "ICI D1033":ti,ab,kw (Word variations have been searched)
- #6 "ZD-1033":ti,ab,kw (Word variations have been searched)
- #7 "Zeneca ZD 1033":ti,ab,kw (Word variations have been searched)
- #8 "ZD1033":ti,ab,kw (Word variations have been searched)
- #9 "Arimidex":ti,ab,kw (Word variations have been searched)
- #10 "Astra brand of anastrozole":ti,ab,kw (Word variations have been searched)
- #11 "Zeneca brand of anastrozole":ti,ab,kw (Word variations have been searched)
- #12 "AstraZeneca brand of anastrozole":ti,ab,kw (Word variations have been searched)
- #13 #4 or #5 or #6 or #7 or #8 or #9 or #10 or #11 or #12
- #14 fulvestrant:ti,ab,kw (Word variations have been searched)
- #15 "ICI 182780":ti,ab,kw (Word variations have been searched)
- #16 "ICI 182,780":ti,ab,kw (Word variations have been searched)
- #17 "ICI-182780":ti,ab,kw (Word variations have been searched)
- #18 "ZM 182780":ti,ab,kw (Word variations have been searched)
- #19 "ZM-182780":ti,ab,kw (Word variations have been searched)
- #20 Faslodex:ti,ab,kw (Word variations have been searched)
- #21 #14 or #15 or #16 or #17 or #18 or #19 or #20
- #22 letrozole:ti,ab,kw (Word variations have been searched)
- #23 Femara:ti,ab,kw (Word variations have been searched)
- #24 Fémará:ti,ab,kw (Word variations have been searched)
- #25 "Novartis Brand of Letrozole":ti,ab,kw (Word variations have been searched)
- #26 "CGS 20267":ti,ab,kw (Word variations have been searched)
- #27 "CGS-20267":ti,ab,kw (Word variations have been searched)
- #28 #22 or #23 or #24 or #25 or #26 or #27
- #29 palbociclib:ti,ab,kw (Word variations have been searched)
- #30 "6-acetyl-8-cyclopentyl-5-methyl-2-(5-piperazin-1-ylpyridin-2-ylamino)-8H-pyrido(2,3-d)pyrimidin-7-one":ti,ab,kw (Word variations have been searched)
- #31 lbrance:ti,ab,kw (Word variations have been searched)
- #32 "PD 0332991":ti,ab,kw (Word variations have been searched)
- #33 PD0332991:ti,ab,kw (Word variations have been searched)
- #34 "PD-0332991":ti,ab,kw (Word variations have been searched)
- #35 #29 or #30 or #31 or #32 or #33 or #34
- #36 MeSH descriptor: [Tamoxifen] explode all trees

#37 "ICI-47699":ti,ab,kw (Word variations have been searched)  
#38 "ICI 47699":ti,ab,kw (Word variations have been searched)  
#39 ICI47699:ti,ab,kw (Word variations have been searched)  
#40 Nolvadex:ti,ab,kw (Word variations have been searched)  
#41 Novaldex:ti,ab,kw (Word variations have been searched)  
#42 "Tamoxifen Citrate":ti,ab,kw (Word variations have been searched)  
#43 "Citrate, Tamoxifen":ti,ab,kw (Word variations have been searched)  
#44 Tomaxithen:ti,ab,kw (Word variations have been searched)  
#45 Zitazonium:ti,ab,kw (Word variations have been searched)  
#46 "ICI-46474":ti,ab,kw (Word variations have been searched)  
#47 "ICI 46474":ti,ab,kw (Word variations have been searched)  
#48 ICI46474:ti,ab,kw (Word variations have been searched)  
#49 "ICI-46,474":ti,ab,kw (Word variations have been searched)  
#50 "ICI 46,474":ti,ab,kw (Word variations have been searched)  
#51 "ICI46,474":ti,ab,kw (Word variations have been searched)  
#52 Soltamox:ti,ab,kw (Word variations have been searched)  
#53 #36 or #37 or #38 or #39 or #40 or #41 or #42 or #43 or #44 or #45 or #46 or #47 or #48 or #49 or #50 or #51 or #52  
#54 exemestane:ti,ab,kw (Word variations have been searched)  
#55 "6-methyleneandrosta-1,4-diene-3,17-dione":ti,ab,kw (Word variations have been searched)  
#56 "FCE 24304":ti,ab,kw (Word variations have been searched)  
#57 "FCE-24304":ti,ab,kw (Word variations have been searched)  
#58 Aromasil:ti,ab,kw (Word variations have been searched)  
#59 Aromasin:ti,ab,kw (Word variations have been searched)  
#60 Aromasine:ti,ab,kw (Word variations have been searched)  
#61 #54 or #55 or #56 or #57 or #58 or #59 or #60  
#62 #3 or #13 or #21 or #28 or #35 or #53 or #61  
#63 MeSH descriptor: [Breast Neoplasms] explode all trees  
#64 "Tumors, Breast":ti,ab,kw (Word variations have been searched)  
#65 "Breast Tumors":ti,ab,kw (Word variations have been searched)  
#66 "Breast Tumor":ti,ab,kw (Word variations have been searched)  
#67 "Tumor, Breast":ti,ab,kw (Word variations have been searched)  
#68 "Neoplasms, Breast":ti,ab,kw (Word variations have been searched)  
#69 "Breast Neoplasm":ti,ab,kw (Word variations have been searched)  
#70 "Neoplasm, Breast":ti,ab,kw (Word variations have been searched)  
#71 "Breast Cancer":ti,ab,kw (Word variations have been searched)  
#72 "Cancer, Breast":ti,ab,kw (Word variations have been searched)  
#73 "Cancer of the Breast":ti,ab,kw (Word variations have been searched)  
#74 "Malignant Neoplasm of Breast":ti,ab,kw (Word variations have been searched)  
#75 "Breast Malignant Neoplasm":ti,ab,kw (Word variations have been searched)  
#76 "Breast Malignant Neoplasms":ti,ab,kw (Word variations have been searched)  
#77 "Malignant Tumor of Breast":ti,ab,kw (Word variations have been searched)  
#78 "Breast Malignant Tumor":ti,ab,kw (Word variations have been searched)

#79 "Breast Malignant Tumors":ti,ab,kw (Word variations have been searched)  
#80 "Cancer of Breast":ti,ab,kw (Word variations have been searched)  
#81 "Breast Carcinoma":ti,ab,kw (Word variations have been searched)  
#82 "Breast Carcinomas":ti,ab,kw (Word variations have been searched)  
#83 "Carcinoma, Breast":ti,ab,kw (Word variations have been searched)  
#84 "Carcinomas, Breast":ti,ab,kw (Word variations have been searched)  
#85 "Mammary Neoplasms, Human":ti,ab,kw (Word variations have been searched)  
#86 "Human Mammary Neoplasm":ti,ab,kw (Word variations have been searched)  
#87 "Human Mammary Neoplasms":ti,ab,kw (Word variations have been searched)  
#88 "Neoplasm, Human Mammary":ti,ab,kw (Word variations have been searched)  
#89 "Neoplasms, Human Mammary":ti,ab,kw (Word variations have been searched)  
#90 "Mammary Neoplasm, Human":ti,ab,kw (Word variations have been searched)  
#91 #63 or #64 or #65 or #66 or #67 or #68 or #69 or #70 or #71 or #72 or #73 or #74 or #75 or  
#76 or #77 or #78 or #79 or #80 or #81 or #82 or #83 or #84 or #85 or #86 or #87 or #88 or #89 or  
#90  
#92 advanced:ti,ab,kw (Word variations have been searched)  
#93 metastatic:ti,ab,kw (Word variations have been searched)  
#94 #92 or #93  
#95 #91 and #94  
#96 #95 and #62
